# Supplementary material
Source: PubMed Central journal article supplement (PMC4091376)
Supplement: psb-8-e27189-s01.pdf [file psb-8-e27189-s01.pdf]

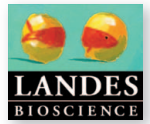

## **Supplemental Material to:**

**Achal Neupane, Madhav P Nepal\*, Benjamin V Benson,  
Kenton J MacArthur, and Sarbottam Piya**

**Evolutionary history of mitogen-activated protein kinase  
(MAPK) genes in Lotus, Medicago, and Phaseolus**

**Plant Signaling & Behavior 2013; 8(11)**

**<http://dx.doi.org/10.4161/psb.27189>**

**[www.landesbioscience.com/journals/psb/article/27189](http://www.landesbioscience.com/journals/psb/article/27189)**

**Figure S1.** Maximum Parsimony analysis of MAPKs from four legume and three non-legume species.

The values above the branches represent bootstrap support of 2000 replicates. The members with phosphorylation motif TEY form clade A, B and C and those with TDY motif form clade D. Some members with the TEY motif and potentially legume specific TQY (denoted by \*) and one of the gene members of soybean with TVY (denoted by \*\*) motif are nested in clade E and B, respectively. The MAPK gene models were accepted for phylogenetic analysis using protein sequences of Serine/Threonine kinase subfamily having conserved Aspartate and Lysine residues in their catalytic domain with (D[L/I/V]K) motif and TXY phosphorylation motif in their activation loop.

**Figure S2.** Phylogram showing the Maximum Likelihood analysis of MAPKs of four legumes (Soybean, *Lotus*, *Medicago* and *Phaseolus*) and their orthologs in three non-legumes (*Arabidopsis*, rice and poplar).

The values above the branches are bootstrap support of 100 replicates. The JTT+G+I evolutionary model was employed to perform Maximum Likelihood analysis. The members with phosphorylation motif TEY are nested in clade A, B and C, those with the TDY motif in clade D, and members with legume specific TQY (denoted by \*) and one of the gene members of soybean with TVY (denoted by \*\*) motif in clade E and B, respectively. The MAPK gene models were accepted for phylogenetic analysis using protein sequences of Serine/Threonine kinase subfamily having conserved Aspartate and Lysine residues in their catalytic domain with (D[L/I/V]K) motif and TXY phosphorylation motif in their activation loop.

**Figure S3.** Gene structure showing intron/exon distribution in MAPK gene members.

The gene structure for all the MAPK gene members used in the analyses were constructed to visualize the evolutionary trend in the homologs of MAPKs in legume and non-legume species.

**Figure S4.** Maximum Parsimony analysis of MAPKKs from four legume and three non-legume species.

The values above the branches represent bootstrap support of 2000 replicates. The MAPKK gene models were accepted for phylogenetic analysis using dual-specificity protein kinases having conserved Aspartate and Lysine residues in their catalytic domain with (D[L/I/V]K) motif and S-X5-T phosphorylation motif along their activation loop.

**Figure S5.** Maximum Likelihood analysis of GmMAPKKs and their orthologs in *Arabidopsis*, poplar and rice.

In the ML phylogram, the values above the branches are bootstrap support of 100 replicates. The JTT+G+I evolutionary model was employed to perform Maximum Likelihood analysis. The MAPKK gene models were accepted for phylogenetic analysis using dual-specificity protein

kinases having conserved Aspartate and Lysine residues in their catalytic domain with (D[L/I/V]K) motif and S-X5-T phosphorylation motif along their activation loop.

**Table S1.** MAPK gene nomenclature and homology assessment in Glycine, Lotus, Medicago and Phaseolus based on their sequence identity, genetic distance and phylogenetic placement.



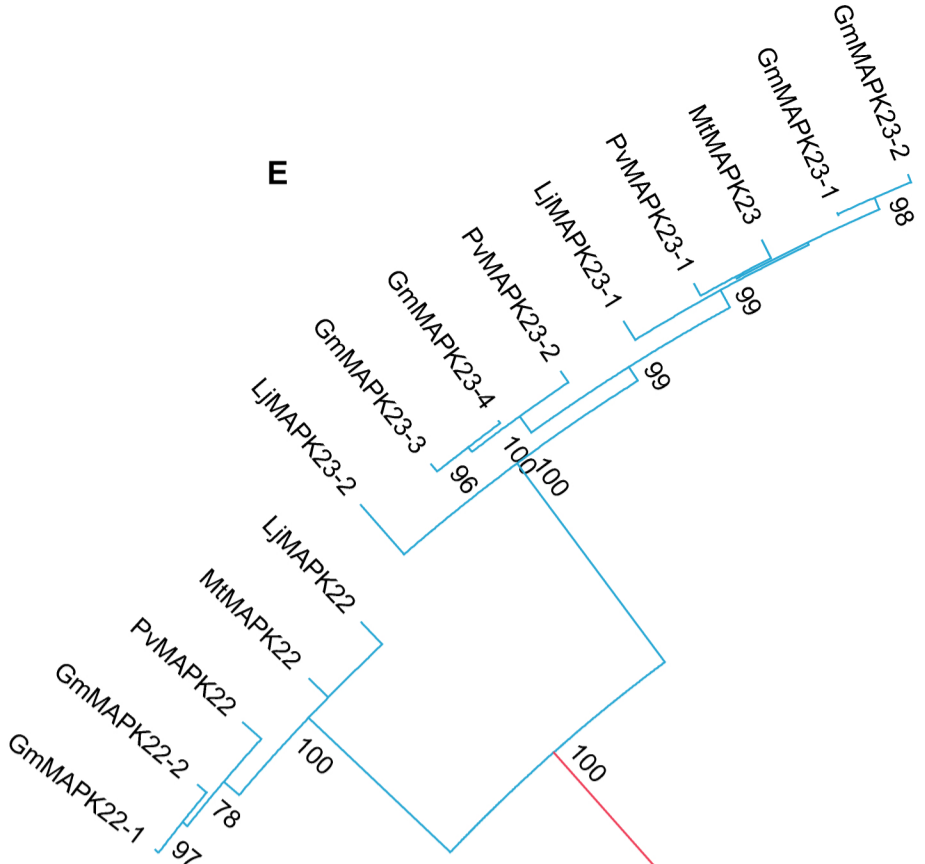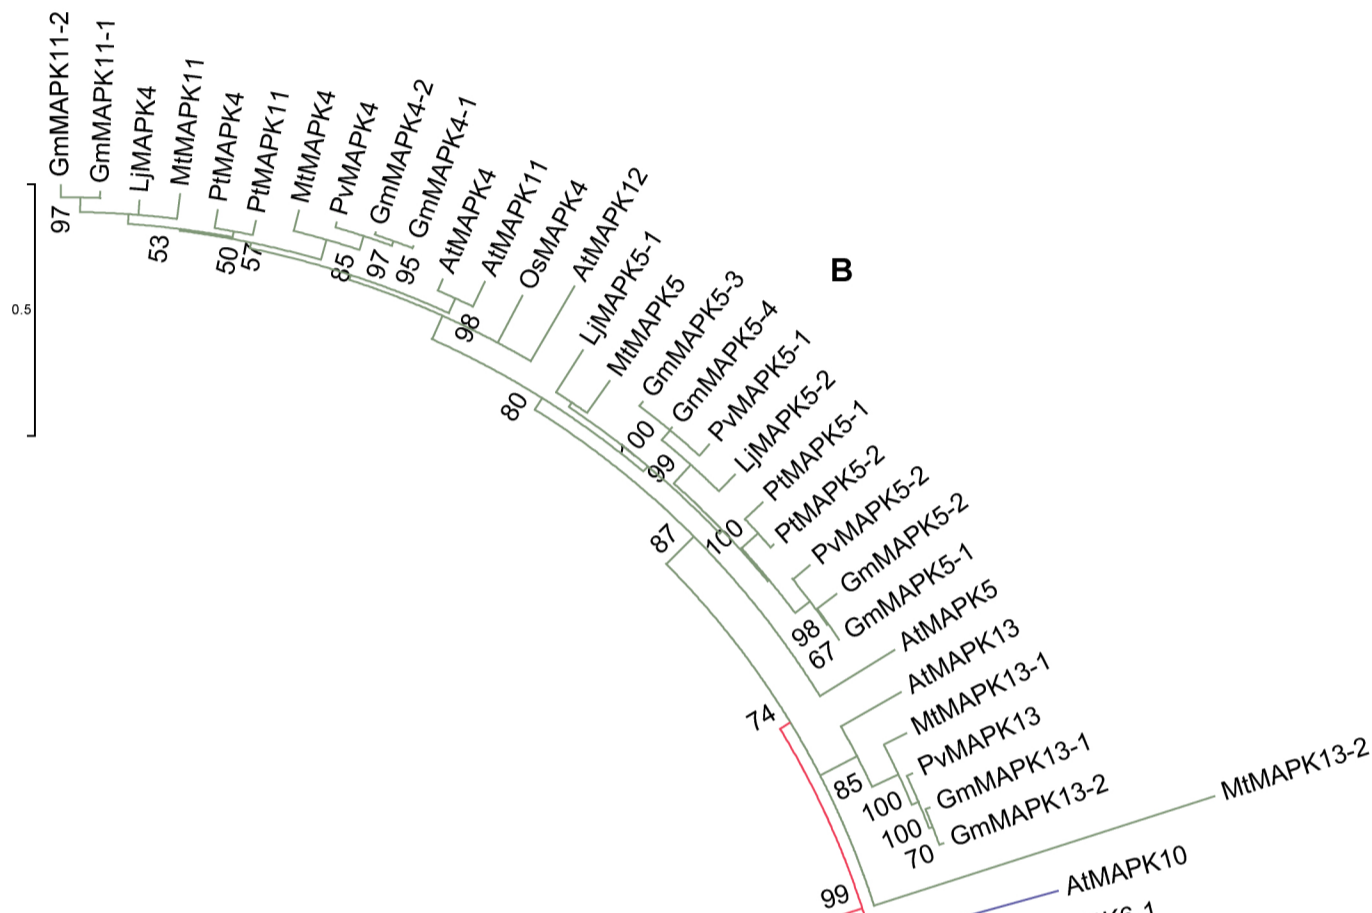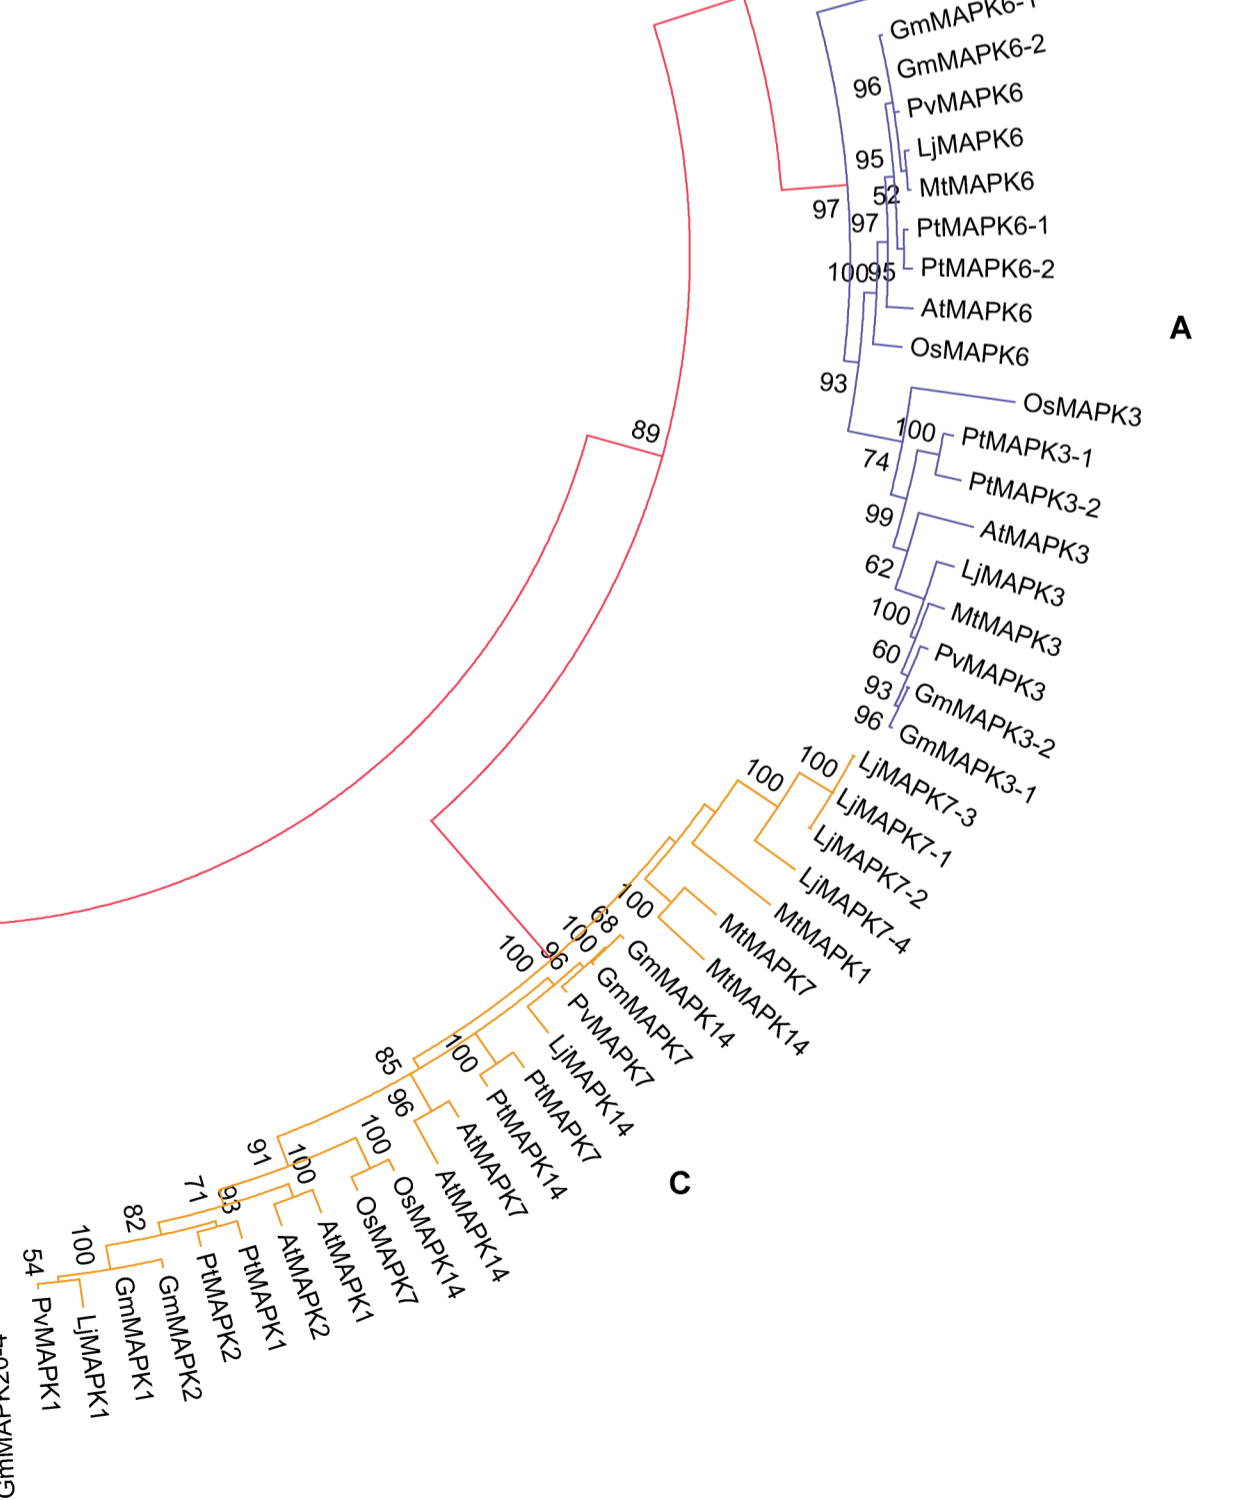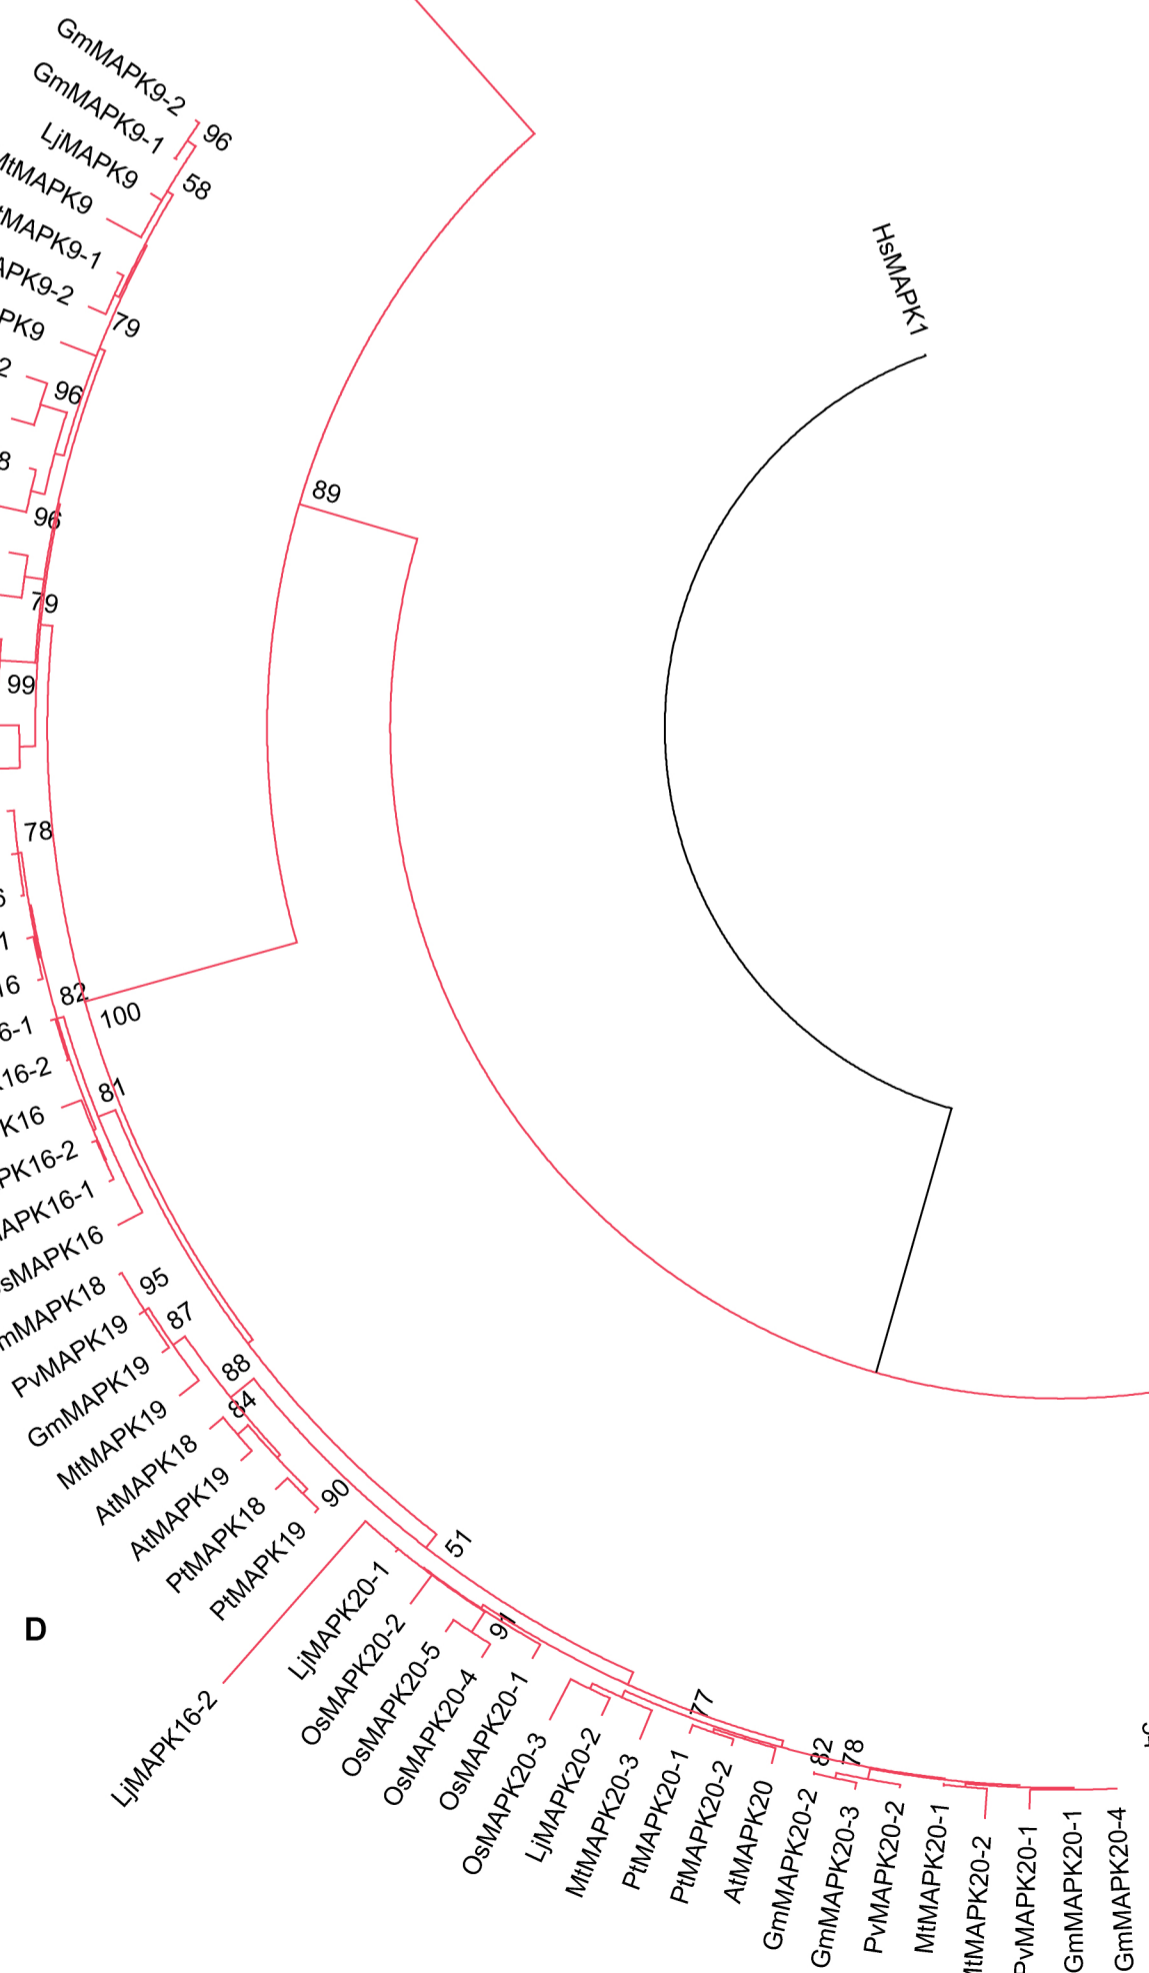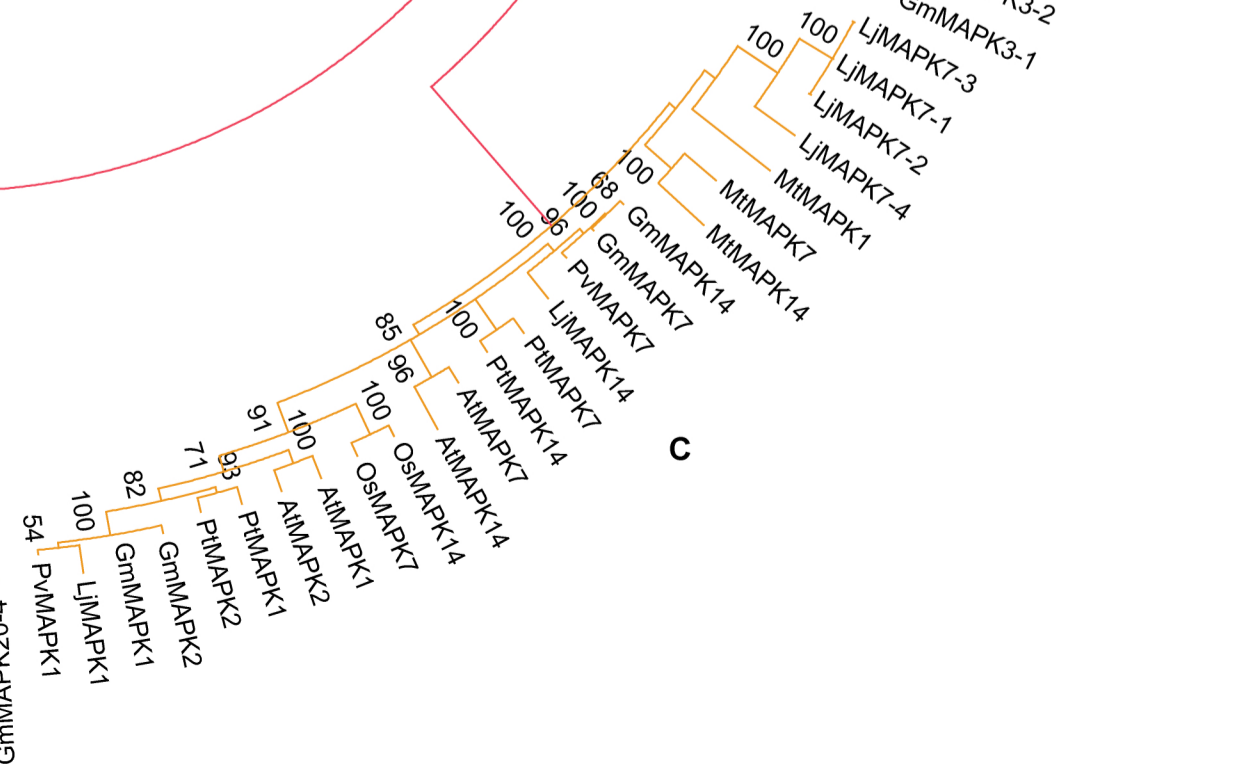

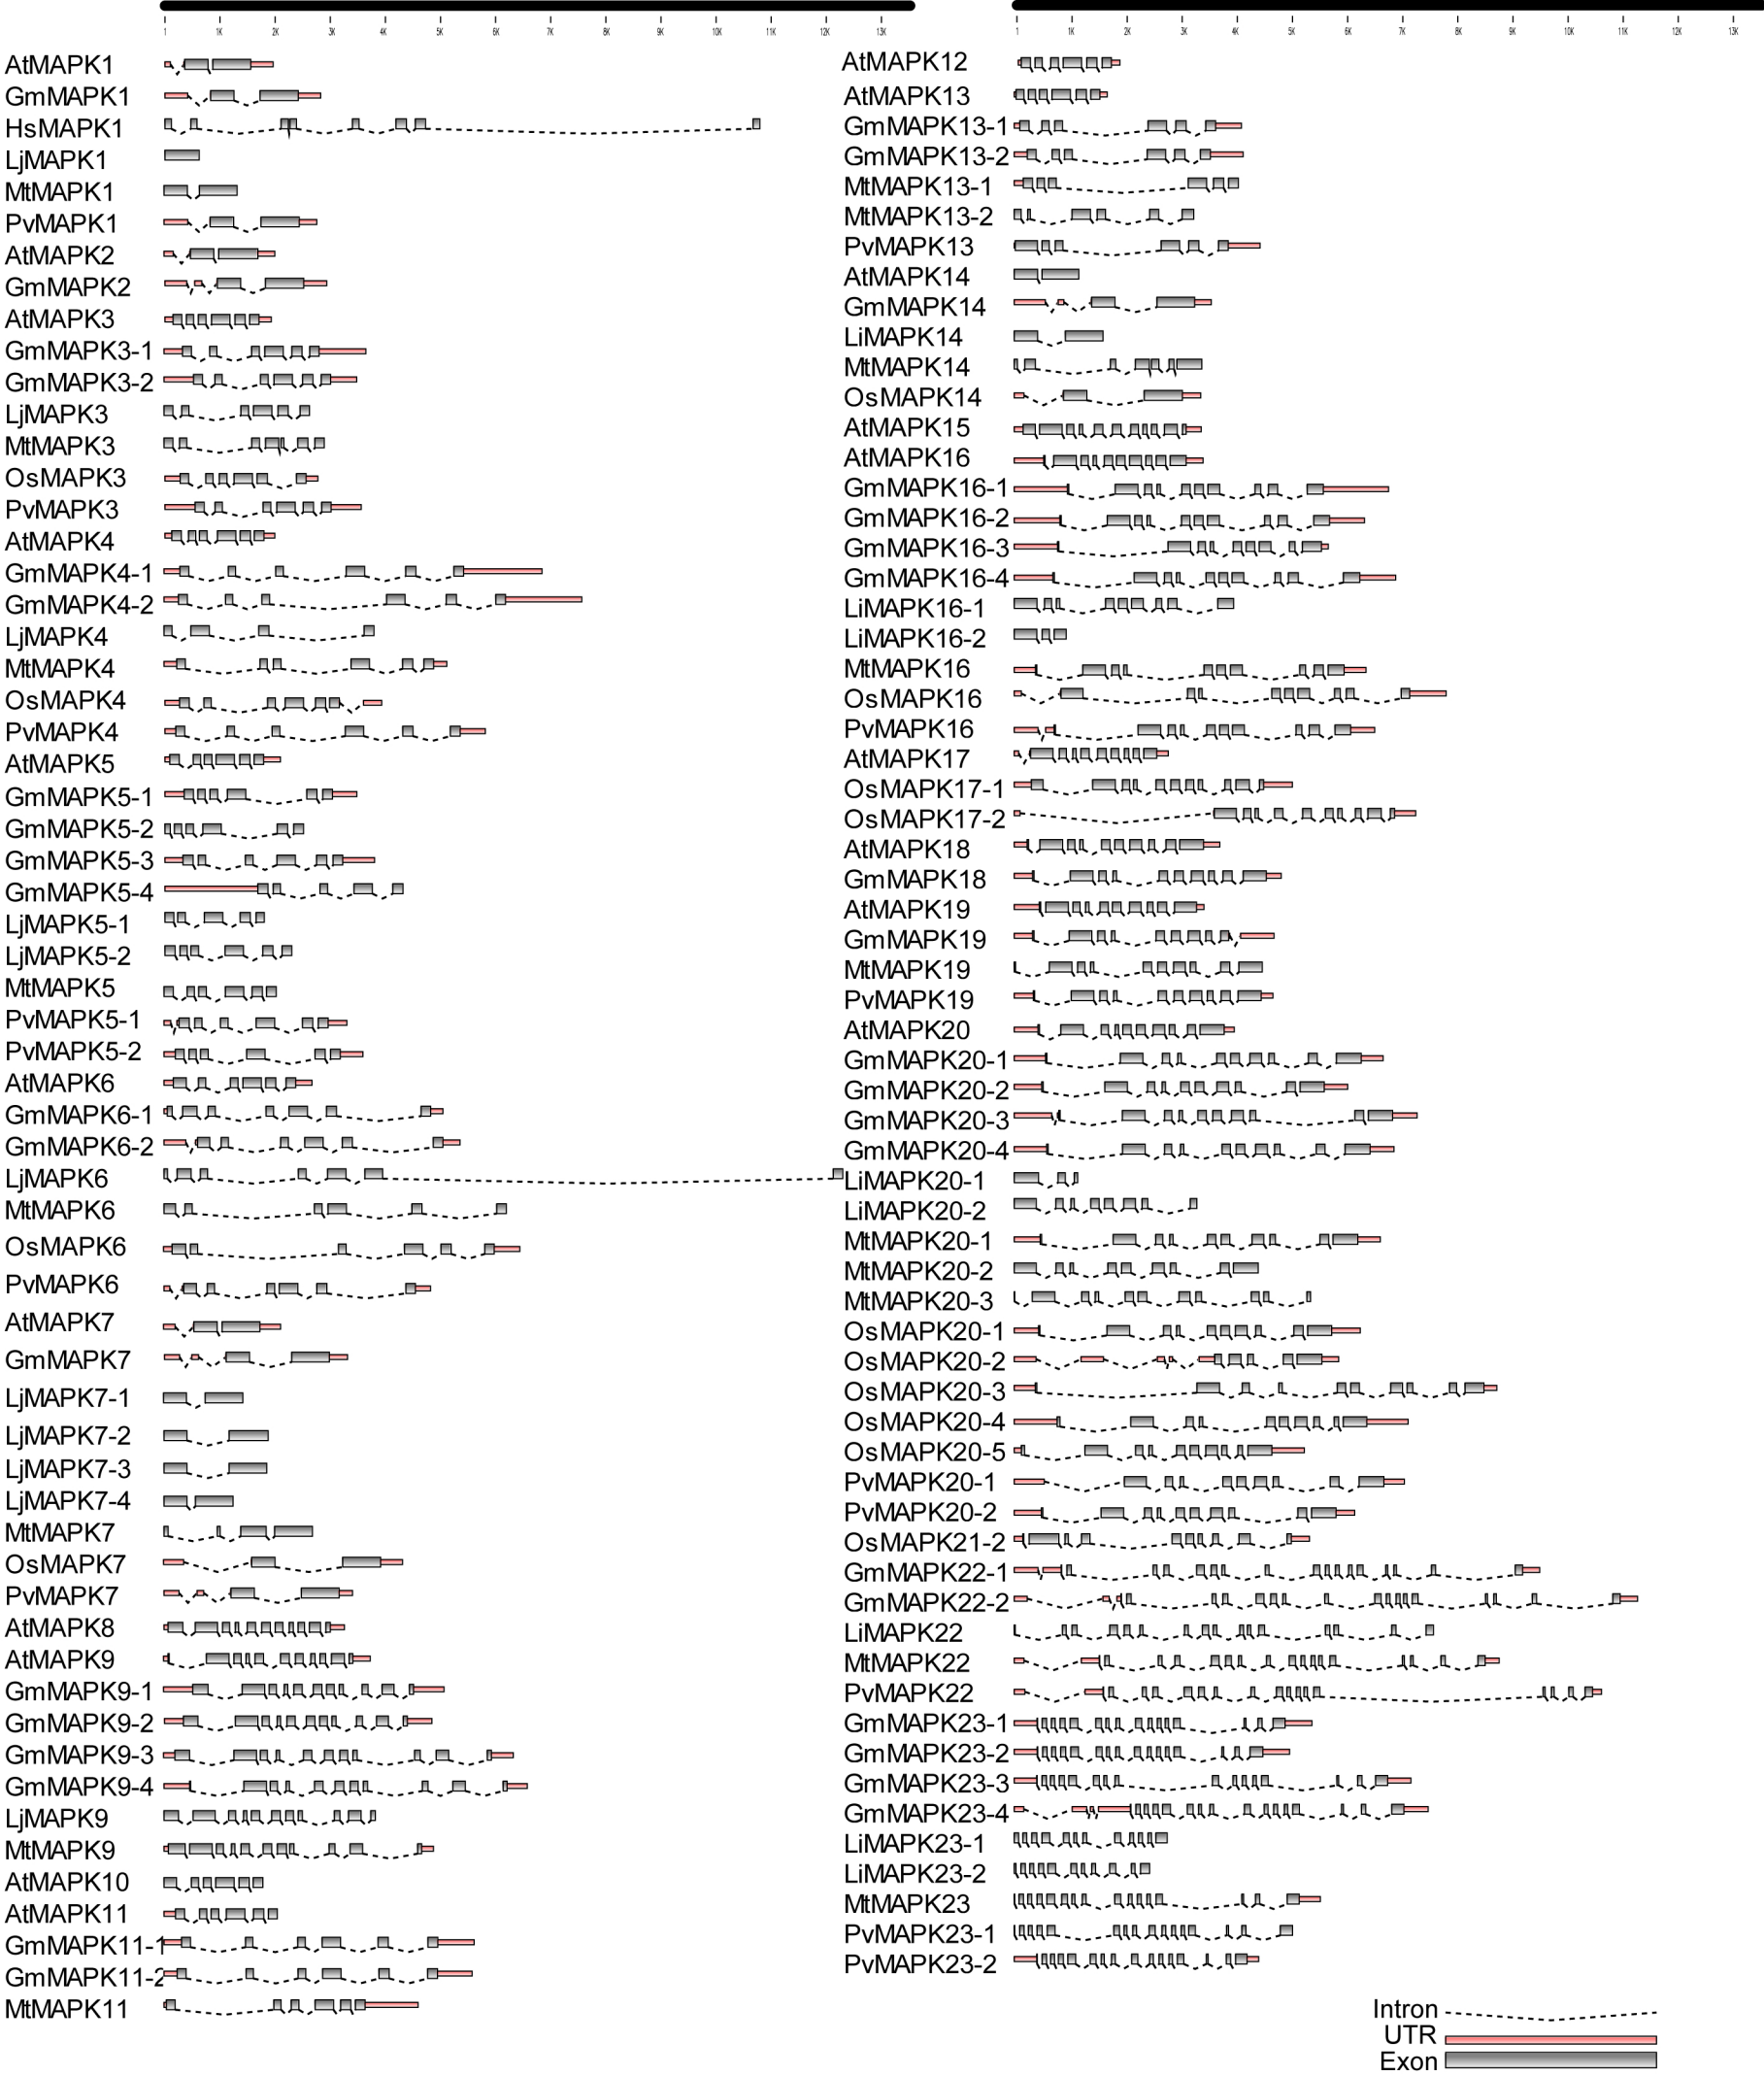

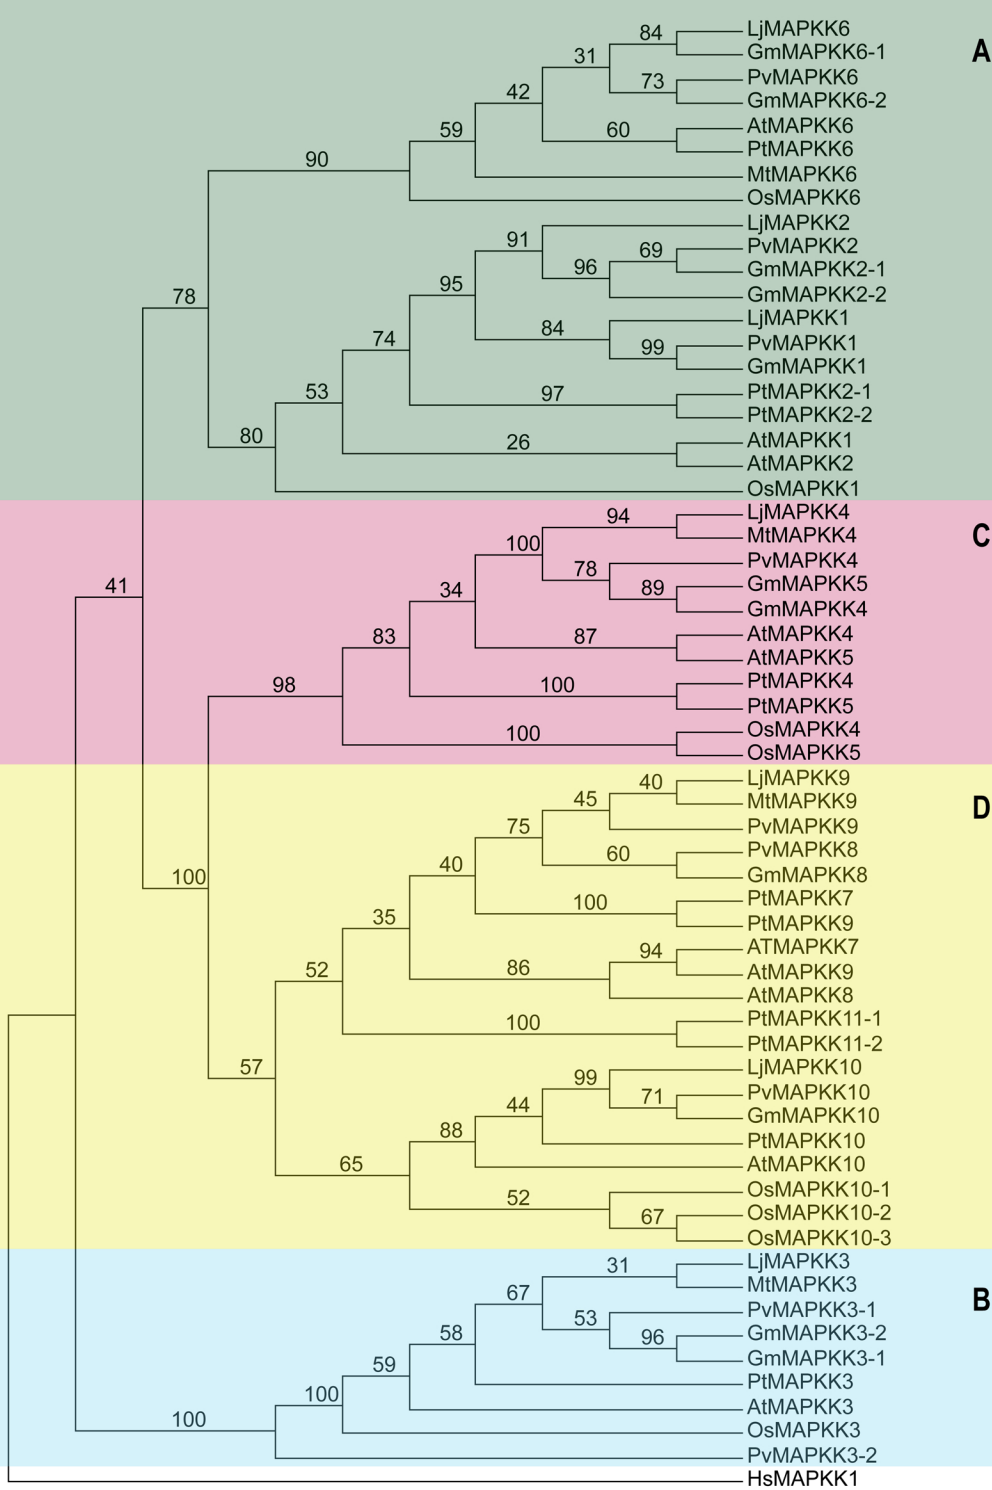

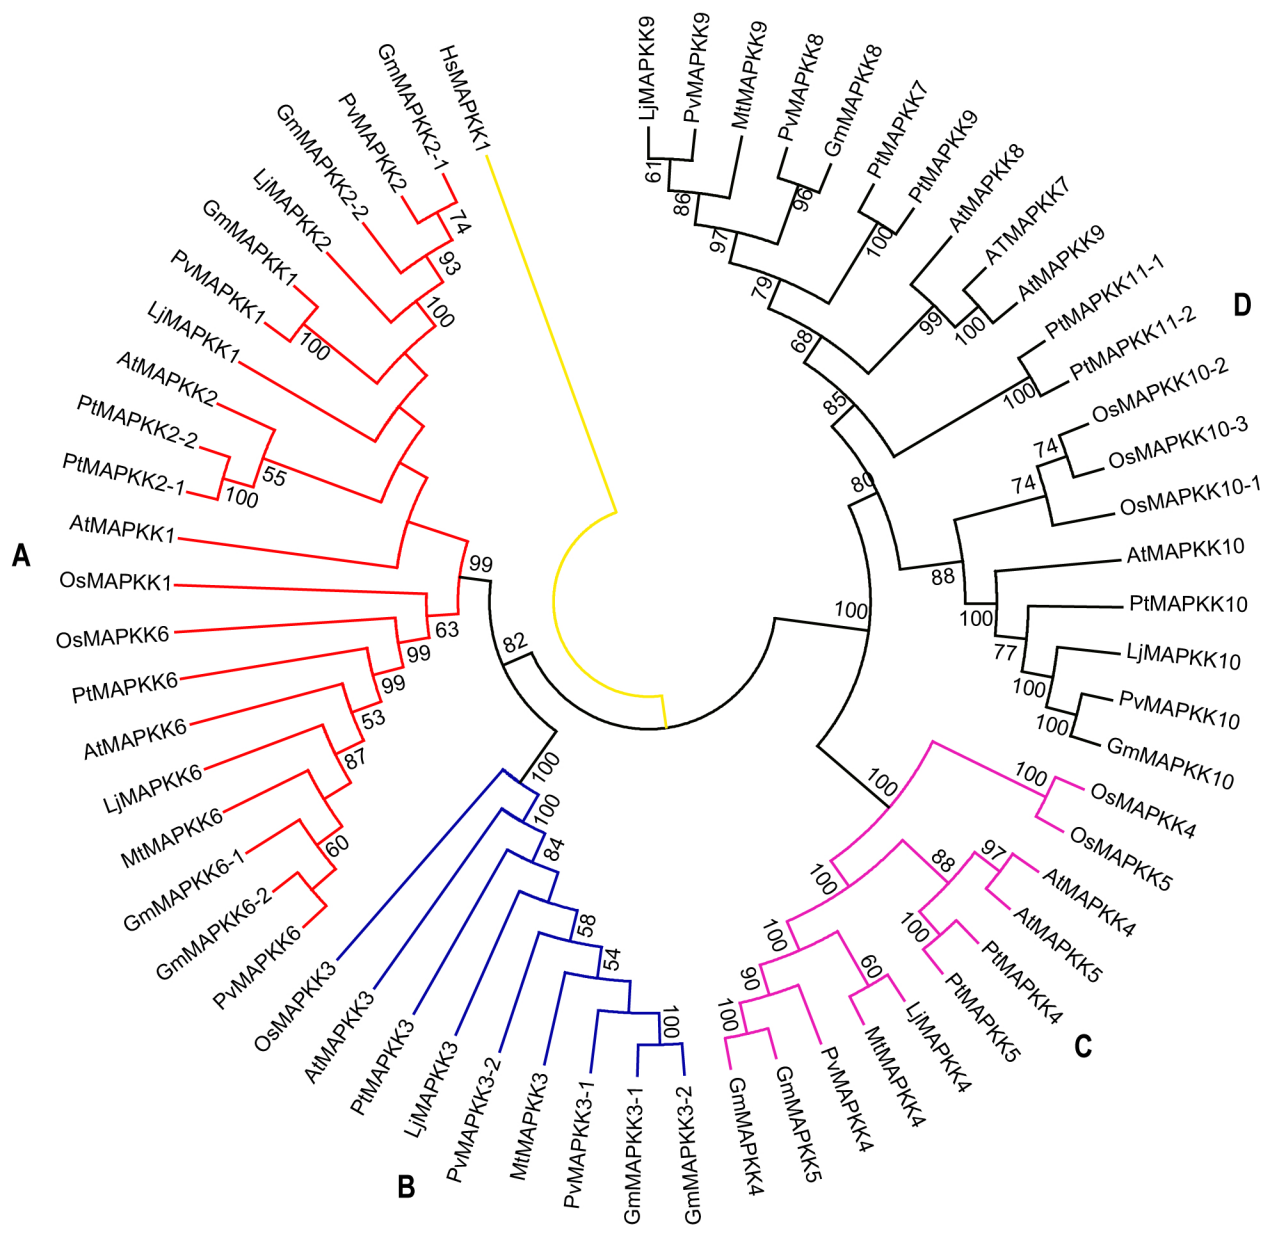



**Additional file 3 – MAPK gene nomenclature and homology assessment in *Glycine* , *Lotus* , *Medicago* and *Phaseolus* based on their sequence identity, genetic distance and phylogenetic placement**

| <b>MAPK</b>               | <b>MAPK new name</b> | <b>Orthologs</b> | <b>% Identity</b> |
|---------------------------|----------------------|------------------|-------------------|
| <b><i>Glycine max</i></b> |                      |                  |                   |
| Glyma04g03210             | GmMAPK1              | AtMAPK1          | 85                |
| Glyma06g03270             | GmMAPK2              | AtMAPK2          | 84                |
| Glyma11g15700             | GmMAPK3-1            | AtMAPK3          | 81.9              |
| Glyma12g07770             | GmMAPK3-2            | AtMAPK3          | 81.4              |
| Glyma07g07270             | GmMAPK4-1            | AtMAPK4          | 86                |
| Glyma16g03670             | GmMAPK4-2            | AtMAPK4          | 85                |
| Glyma01g43100             | GmMAPK5-1            | AtMAPK5          | 76.2              |
| Glyma11g02420             | GmMAPK5-2            | AtMAPK5          | 75                |
| Glyma08g02060             | GmMAPK5-3            | AtMAPK5          | 75                |
| Glyma05g37480             | GmMAPK5-4            | AtMAPK5          | 74                |
| Glyma07g32750             | GmMAPK6-1            | AtMAPK6          | 87.6              |
| Glyma02g15690             | GmMAPK6-2            | AtMAPK6          | 87.6              |
| Glyma05g28980             | GmMAPK7              | AtMAPK7          | 85                |
| Glyma05g33980             | GmMAPK9-1            | AtMAPK9          | 82.7              |
| Glyma08g05700             | GmMAPK9-2            | AtMAPK9          | 81.9              |
| Glyma07g11470             | GmMAPK9-3            | AtMAPK9          | 79                |
| Glyma09g30790             | GmMAPK9-4            | AtMAPK9          | 79                |
| Glyma18g47140             | GmMAPK11-1           | AtMAPK11         | 92                |
| Glyma09g39190             | GmMAPK11-2           | AtMAPK11         | 92                |
| Glyma12g07850             | GmMAPK13-1           | AtMAPK13         | 78                |
| Glyma11g15590             | GmMAPK13-2           | AtMAPK13         | 78                |
| Glyma08g12150             | GmMAPK14             | AtMAPK14         | 80                |
| Glyma13g28120             | GmMAPK16-1           | AtMAPK16         | 80                |
| Glyma15g10940             | GmMAPK16-2           | AtMAPK16         | 80                |
| Glyma17g02220             | GmMAPK16-3           | AtMAPK16         | 76                |
| Glyma07g38510             | GmMAPK16-4           | AtMAPK16         | 76                |
| Glyma15g38490             | GmMAPK18             | AtMAPK18         | 70                |
| Glyma13g33860             | GmMAPK19             | AtMAPK19         | 68                |
| Glyma18g12720             | GmMAPK20-1           | AtMAPK20         | 73                |
| Glyma14g03190             | GmMAPK20-2           | AtMAPK20         | 71                |
| Glyma02g45630             | GmMAPK20-3           | AtMAPK20         | 71                |

|               |            |                |                   |
|---------------|------------|----------------|-------------------|
| Glyma08g42240 | GmMAPK20-4 | AtMAPK20       | 73                |
| Glyma03g21610 | GmMAPK22-1 | No At ortholog | 95 with GmMAPK22  |
| Glyma16g10820 | GmMAPK22-2 | No At ortholog | 95 with GmMAPK22  |
| Glyma01g35190 | GmMAPK23-1 | No At ortholog | >80 with GmMAPK23 |
| Glyma09g34610 | GmMAPK23-2 | No At ortholog | >80 with GmMAPK23 |
| Glyma16g08080 | GmMAPK23-3 | No At ortholog | >80 with GmMAPK23 |
| Glyma16g17580 | GmMAPK23-4 | No At ortholog | >80 with GmMAPK23 |

***Lotus Japonicus***

|                       |            |          |      |
|-----------------------|------------|----------|------|
| LjSGA_048326.1        | LjMAPK1    | AtMAPK1  | 84.4 |
| chr3.CM0616.20.r2.d   | LjMAPK3    | AtMAPK3  | 82.4 |
| chr1.LjT10B06.60.r2.d | LjMAPK4    | AtMAPK4  | 89.5 |
| LjSGA_018738.1        | LjMAPK5-1  | AtMAPK5  | 72.8 |
| chr4.CM0004.850.r2.d  | LjMAPK5-2  | AtMAPK5  | 75.5 |
| chr4.CM0432.3930.r2.a | LjMAPK6    | AtMAPK6  | 78.3 |
| chr4.CM0432.3950.r2.a | LjMAPK7-1  | AtMAPK7  | 72.8 |
| chr4.CM0432.3740.r2.d | LjMAPK7-2  | AtMAPK7  | 72.6 |
| chr4.CM0432.3910.r2.a | LjMAPK7-3  | AtMAPK7  | 72.6 |
| chr4.CM0432.3920.r2.a | LjMAPK7-4  | AtMAPK7  | 70.8 |
| chr4.CM0042.2140.r2.m | LjMAPK9    | AtMAPK9  | 79.9 |
| chr4.CM0046.800.r2.a  | LjMAPK14   | AtMAPK14 | 79.7 |
| chr6.CM0139.840.r2.m  | LjMAPK16-1 | AtMAPK16 | 79.4 |
| chr4.CM0387.480.r2.d  | LjMAPK16-2 | AtMAPK16 | 72.1 |
| chr6.CM0836.450.r2.d  | LjMAPK20-1 | AtMAPK20 | 90.3 |
| chr2.CM0099.20.r2.d   | LjMAPK20-2 | AtMAPK20 | 82.2 |
| chr3.CM0423.40.r2.a   | LjMAPK22   | GmMAPK22 | 81.3 |
| LjSGA_012212.1        | LjMAPK23-1 | GmMAPK23 | 86.7 |
| LjSGA_018456.1        | LjMAPK23-2 | GmMAPK23 | 76.7 |

***Medicago truncatula***

|                 |         |         |      |
|-----------------|---------|---------|------|
| Medtr3g060330.1 | MtMAPK1 | AtMAPK1 | 70.2 |
| Medtr4g061130.1 | MtMAPK3 | AtMAPK3 | 77.3 |
| Medtr7g038040.1 | MtMAPK4 | AtMAPK4 | 82.2 |
| Medtr5g010030.1 | MtMAPK5 | AtMAPK5 | 73.2 |
| Medtr4g087620.1 | MtMAPK6 | AtMAPK6 | 88.4 |
| Medtr8g086000.1 | MtMAPK7 | AtMAPK7 | 71.4 |

|                 |            |          |      |
|-----------------|------------|----------|------|
| Medtr8g106960.1 | MtMAPK9    | AtMAPK9  | 78.2 |
| Medtr7g078690.1 | MtMAPK11   | AtMAPK11 | 82.7 |
| Medtr4g061320.1 | MtMAPK13-1 | AtMAPK13 | 78.5 |
| Medtr4g061330.1 | MtMAPK13-2 | AtMAPK13 | 56.3 |
| Medtr8g086010.1 | MtMAPK14   | AtMAPK14 | 53.7 |
| Medtr2g021330.1 | MtMAPK16   | AtMAPK16 | 79.1 |
| AC235677_37.1   | MtMAPK19   | AtMAPK19 | 69.5 |
| Medtr3g089510.1 | MtMAPK20-1 | AtMAPK20 | 72.3 |
| AC225528_53.1   | MtMAPK20-2 | AtMAPK20 | 69.2 |
| Medtr5g091680.1 | MtMAPK20-3 | AtMAPK20 | 71.5 |
| Medtr8g012450.1 | MtMAPK22   | GmMAPK22 | 88   |
| Medtr5g026960.1 | MtMAPK23   | GmMAPK23 | 88   |

***Phaseolus vulgaris***

|                    |            |          |      |
|--------------------|------------|----------|------|
| Phvul.009G061000.1 | PvMAPK1    | AtMAPK1  | 85.7 |
| Phvul.011G071400.1 | PvMAPK3    | AtMAPK3  | 82.7 |
| Phvul.010G102800.1 | PvMAPK4    | AtMAPK4  | 84.6 |
| Phvul.002G292400.1 | PvMAPK5-1  | AtMAPK5  | 75.3 |
| Phvul.002G159500.1 | PvMAPK5-2  | AtMAPK5  | 74.2 |
| Phvul.003G059500.1 | PvMAPK6    | AtMAPK6  | 87.6 |
| Phvul.002G237500.1 | PvMAPK7    | AtMAPK7  | 85.6 |
| Phvul.011G070800.1 | PvMAPK13   | AtMAPK13 | 78.5 |
| Phvul.003G095900.1 | PvMAPK16   | AtMAPK16 | 77.3 |
| Phvul.005G069800.1 | PvMAPK19   | AtMAPK19 | 71   |
| Phvul.006G033600.1 | PvMAPK20-1 | AtMAPK20 | 70.6 |
| Phvul.008G191500.1 | PvMAPK20-2 | AtMAPK20 | 70.5 |
| Phvul.010G023600.1 | PvMAPK22   | GmMAPK22 | 92.9 |
| Phvul.002G131400.1 | PvMAPK23-1 | GmMAPK23 | 92.5 |
| Phvul.003G279600.1 | PvMAPK23-2 | GmMAPK23 | 90   |

**MAPKK**

**MAPKK new name Orthologs**

**%Identity**

***Glycine max***

|               |          |            |    |
|---------------|----------|------------|----|
| Glyma15g18860 | AtMAPKK1 | GmMAPKK1   | 64 |
| Glyma13g16650 | AtMAPKK2 | GmMAPKK2-1 | 67 |
| Glyma17g06020 | AtMAPKK2 | GmMAPKK2-2 | 67 |
| Glyma05g08720 | AtMAPKK3 | GmMAPKK3-1 | 80 |

|               |           |            |    |
|---------------|-----------|------------|----|
| Glyma19g00220 | AtMAPKK3  | GmMAPKK3-2 | 78 |
| Glyma07g00520 | AtMAPKK4  | GmMAPKK4   | 68 |
| Glyma08g23900 | AtMAPKK5  | GmMAPKK5   | 72 |
| Glyma10g15850 | AtMAPKK6  | GmMAPKK6-1 | 89 |
| Glyma02g32980 | AtMAPKK6  | GmMAPKK6-2 | 85 |
| Glyma09g30310 | AtMAPKK8  | GmMAPKK8   | 44 |
| Glyma01g01980 | AtMAPKK10 | GmMAPKK10  | 54 |

***Lotus Japonicus***

|                        |           |           |      |
|------------------------|-----------|-----------|------|
| chr6.CM0013.1740.r2.d  | LjMAPKK1  | AtMAPKK1  | 45.8 |
| chr4.CM0297.320.r2.m   | LjMAPKK2  | AtMAPKK2  | 67   |
| chr2.CM0263.270.r2.m   | LjMAPKK3  | AtMAPKK3  | 77.4 |
| chr3.LjB21L17.150.r2.a | LjMAPKK4  | AtMAPKK4  | 66.1 |
| chr2.CM0065.640.r2.d   | LjMAPKK6  | AtMAPKK6  | 82.2 |
| LjSGA_014749.1.1       | LjMAPKK9  | AtMAPKK9  | 57.4 |
| LjSGA_023606.1         | LjMAPKK10 | AtMAPKK10 | 49.5 |

***Medicago truncatula***

|                 |          |          |      |
|-----------------|----------|----------|------|
| Medtr6g005210.1 | MtMAPKK3 | AtMAPKK3 | 77.5 |
| Medtr4g005830.1 | MtMAPKK4 | AtMAPKK4 | 67.2 |
| Medtr6g090470.1 | MtMAPKK6 | AtMAPKK6 | 61.6 |
| Medtr6g071280.1 | MtMAPKK9 | AtMAPKK9 | 56   |

***Phaseolus vulgaris***

|                    |            |           |      |
|--------------------|------------|-----------|------|
| Phvul.009G229800.1 | PvMAPKK1   | AtMAPKK1  | 61.2 |
| Phvul.003G134100.1 | PvMAPKK2   | AtMAPKK2  | 64.8 |
| Phvul.004G010400.1 | PvMAPKK3-1 | AtMAPKK3  | 78.6 |
| Phvul.007G112700.1 | PvMAPKK3-2 | AtMAPKK3  | 72.7 |
| Phvul.010G163000.1 | PvMAPKK4   | AtMAPKK4  | 66.6 |
| Phvul.004G174500.1 | PvMAPKK6   | AtMAPKK6  | 86.8 |
| Phvul.004G147900.1 | PvMAPKK8   | AtMAPKK8  | 41.1 |
| Phvul.004G147800.1 | PvMAPKK9   | AtMAPKK9  | 57.3 |
| Phvul.002G138400.1 | PvMAPKK10  | AtMAPKK10 | 49.4 |
